# Supplementary material
Source: publisher site journal article supplement (http://kjim.org/upload/media/kjim-2023-160-Supplementary-Table-2.pdf)
Supplement: Supplementary file 1 [file kjim-2023-160-Supplementary-Table-2.pdf]

**Supplementary Table 2. Causative organism of bacteremia in cancer patients with antibiotics use**

| Causative organism of bacteremia                     | Value (n = 24) |
|------------------------------------------------------|----------------|
| <i>Escherichia coli</i> (non-ESBL-producing)         | 3 (12.5)       |
| <i>Escherichia coli</i> (ESBL-producing)             | 2 (8.3)        |
| <i>Klebsiella pneumoniae</i> (non-ESBL-producing)    | 1 (4.2)        |
| <i>Klebsiella pneumoniae</i> (ESBL-producing)        | 2 (8.3)        |
| <i>Klebsiella oxytoca</i> (ESBL-producing)           | 2 (8.3)        |
| <i>Klebsiella pneumoniae</i> (carbapenem-resistant)  | 1 (4.2)        |
| Methicillin resistant <i>Staphylococcus aureus</i>   | 2 (8.3)        |
| <i>Bacteroides fragilis</i>                          | 2 (8.3)        |
| <i>Corynebacterium</i>                               | 2 (8.3)        |
| <i>Enterococcus faecalis</i>                         | 1 (4.2)        |
| <i>Enterococcus avium</i>                            | 1 (4.2)        |
| <i>Enterococcus faecium</i> (vancomycin-resistant)   | 1 (4.2)        |
| <i>Streptococcus constellatus</i>                    | 1 (4.2)        |
| <i>Streptococcus hominis</i>                         | 1 (4.2)        |
| <i>Bacillus</i> spp.                                 | 1 (4.2)        |
| <i>Clostridium ramosum</i>                           | 1 (4.2)        |
| <i>Peptostreptococcus anaerobius</i>                 | 1 (4.2)        |
| <i>Enterobacter cloacae</i>                          | 1 (4.2)        |
| <i>Proteus mirabilis</i>                             | 1 (4.2)        |
| <i>Citrobacter freundii</i>                          | 1 (4.2)        |
| <i>Pseudomonas aeruginosa</i> (carbapenem resistant) | 1 (4.2)        |
| <i>Fusobacterium nucleatum</i>                       | 1 (4.2)        |
| <i>Capnocytophaga sputigena</i>                      | 1 (4.2)        |

Values are presented as number (%).

ESBL, extended spectrum beta-lactamase.
